# Supplementary material
Source: PubMed Central journal article supplement (PMC2830444)
Supplement: mmc1.pdf [file mmc1.pdf]

Biophysical Journal, Volume 98

Supporting Material

Determination of Ensemble-average Pairwise RMSD from Experimental B-factors

**Antonija Kuzmanic and Bojan Zagrovic**

# Determination of Ensemble-average Pairwise RMSD from Experimental B-factors

(Supporting Material)

**Antonija Kuzmanic<sup>1</sup> & Bojan Zagrovic<sup>1,2,\*</sup>**

12.10.2009

<sup>1</sup>Laboratory of Computational Biophysics  
Mediterranean Institute for Life Sciences  
Mestrovicevo setaliste bb  
Split, HR-21000, Croatia  
E-mail: zagrovic@medils.hr  
Phone: +385-21-555-602  
Fax: +385-21-555-605

<sup>2</sup>Department of Physics  
Faculty of Science  
University of Split  
Teslina 12  
Split, HR-21000, Croatia

\*corresponding author

**SHORT TITLE:** Determination of Average RMSD from B-factors

**KEYWORDS:** RMSF; temperature factors; Debye-Waller factors; distributed computing

TABLE S1. Number of structures in clusters. Structures were clustered based on their pairwise RMSD values as described in the Methods. Clustering was done for two data sets - native and unfolded villin structures, and for two types of the alignment: pairwise alignment (PA) and alignment to a reference structure (RSA).

| <b>Cluster index</b> | <b>PA - native</b> | <b>RSA - native</b> | <b>PA - unfolded</b> | <b>RSA - unfolded</b> |
|----------------------|--------------------|---------------------|----------------------|-----------------------|
| 1                    | 88                 | 94                  | 3                    | 4                     |
| 2                    | 295                | 327                 | 14                   | 30                    |
| 3                    | 462                | 493                 | 106                  | 312                   |
| 4                    | 627                | 690                 | 519                  | 1129                  |
| 5                    | 672                | 764                 | 1221                 | 1939                  |
| 6                    | 678                | 774                 | 1829                 | 2220                  |
| 7                    | 710                | 803                 | 2034                 | 2193                  |
| 8                    | 696                | 749                 | 1876                 | 1864                  |
| 9                    | 748                | 777                 | 1668                 | 1699                  |
| 10                   | 958                | 1034                | 1454                 | 1476                  |
| 11                   | 701                | 766                 | 1141                 | 1554                  |
| 12                   | 765                | 733                 | 941                  | 1255                  |
| 13                   | 785                | 900                 | 918                  | 922                   |
| 14                   | 737                | 775                 | 902                  | 577                   |
| 15                   | 729                | 742                 | 890                  | 241                   |
| 16                   | 701                | 740                 | 659                  | 142                   |
| 17                   | 620                | 739                 | 335                  | 68                    |
| 18                   | 638                | 408                 | 72                   | 28                    |
| 19                   | 265                | 99                  | 23                   | 14                    |
| 20                   | 25                 | 12                  | 4                    | 6                     |

## **Selection of X-ray Structures and RMSD Calculations**

Structures used for calculations were downloaded from the RCSB Protein Data Bank on 11<sup>th</sup> May 2009 using the following search criteria: structures had to be solved by X-ray crystallography with resolution lower than 2.8 Å and refinement  $R_{\text{free}}$  factor lower than 0.2; they had to contain proteins, but no nucleic acids. We downloaded 4814 structures and from that data set we excluded structures that had non-physical, negative B-factors (3 structures).  $R_{\text{struct}}$  was calculated for every structure using Eq. 25 and  $\langle \text{RMSD}^2 \rangle^{1/2}$  using Eq. 20 assuming  $N_s \gg 1$ . Calculations were done for backbone atoms and for all atoms. Both distributions of the calculated values were plotted.
